# Supplementary material for: Socioeconomic Status and Knowledge of Cardiovascular Risk Factors: NIPPON DATA2010
Source: PubMed Central journal article supplement (PMC5825694; doi:10.2188/jea.je20170255), 2018-03-05
Supplement: je-28-S046-s001.pdf [file je-28-S046-s001.pdf]

**eTable 1.** Characteristics of study participants by socioeconomic status: NIPPON DATA2010

|                                    | Employment status |                | Length of education |              |                | Marital status |                | Living status   |                | Equivalent household expenditure |                 |
|------------------------------------|-------------------|----------------|---------------------|--------------|----------------|----------------|----------------|-----------------|----------------|----------------------------------|-----------------|
|                                    | Employed          | Unemployed     | ≥13 years           | 10-12 years  | <10 years      | Ever married   | Never married  | Living together | Living alone   | Upper 4 quintiles                | Lowest quintile |
|                                    | (n=1,293)         | (n=1,174)      | (n=797)             | (n=1,090)    | (n=580)        | (n=2,249)      | (n=218)        | (n=2,193)       | (n=274)        | (n=1,984)                        | (n=483)         |
| Age, years                         | 51.8 (14.3)       | 65.4 (14.0) *  | 50.0 (15.1)         | 58.7 (14.6)  | 68.9 (11.2) *  | 60.2 (14.5)    | 38.8 (14.3) *  | 57.4 (15.5)     | 65.7 (15.0) *  | 58.0 (15.6)                      | 59.5 (16.1)     |
| Sex, women, n                      | 616 (47.6%)       | 822 (70.0%) †  | 448 (56.2%)         | 658 (60.4%)  | 332 (57.2%)    | 1333 (59.3%)   | 105 (51.8%) †  | 1261 (57.5%)    | 177 (64.6%) †  | 1154 (58.2%)                     | 284 (58.8%)     |
| Regular exercise, n                | 324 (25.1%)       | 507 (43.3%) †  | 235 (29.5%)         | 380 (35.0%)  | 216 (37.3%) †  | 776 (34.6%)    | 55 (25.4%) †   | 711 (32.5%)     | 120 (43.8%) †  | 678 (34.2%)                      | 153 (31.8%)     |
| Smoking                            |                   |                |                     |              |                |                |                |                 |                |                                  |                 |
| Current smoker, n                  | 281 (21.8%)       | 100 (8.5%) †   | 107 (13.4%)         | 182 (16.8%)  | 92 (15.9%)     | 326 (14.5%)    | 55 (25.2%) †   | 338 (15.4%)     | 43 (15.8%)     | 303 (15.3%)                      | 78 (16.2%)      |
| Ex-smoker, n                       | 247 (19.1%)       | 213 (18.2%)    | 143 (18.0%)         | 201 (18.5%)  | 116 (20.0%)    | 437 (19.5%)    | 23 (10.6%)     | 419 (19.1%)     | 41 (15.0%)     | 364 (18.4%)                      | 96 (19.9%)      |
| Alcohol consumption, g/week        | 95.0 (152.5)      | 46.9 (103.7) * | 70.6 (124.2)        | 76.1 (140.8) | 66.7 (132.7)   | 73.7 (135.7)   | 56.1 (109.9)   | 72.7 (133.6)    | 67.6 (134.6)   | 75.1 (139.2)                     | 60.1 (107.9) *  |
| Body mass index, kg/m <sup>2</sup> | 23.1 (3.5)        | 23.1 (3.4)     | 22.7 (3.4)          | 23.1 (3.3)   | 23.7 (3.5) *   | 23.1 (3.3)     | 22.8 (4.4)     | 23.1 (3.4)      | 23.4 (3.3)     | 23.1 (3.4)                       | 23.2 (3.6)      |
| Systolic blood pressure, mm Hg     | 128.9 (18.3)      | 135.6 (20.0) * | 125.8 (18.0)        | 133.0 (19.2) | 138.9 (18.9) * | 133.1 (19.3)   | 121.0 (17.0) * | 131.2 (19.2)    | 138.9 (20.1) * | 131.8 (19.3)                     | 133.0 (20.0)    |
| Diastolic blood pressure, mm Hg    | 79.5 (11.0)       | 79.2 (11.1)    | 78.3 (10.9)         | 79.8 (10.9)  | 79.9 (11.4) *  | 79.7 (11.0)    | 76.1 (11.7) *  | 79.2 (11.0)     | 80.7 (11.4) *  | 79.4 (11.0)                      | 79.2 (11.4)     |
| HbA1c (NGSP), %                    | 5.7 (0.8)         | 5.9 (0.8) *    | 5.6 (0.7)           | 5.8 (0.8)    | 5.9 (0.8) *    | 5.8 (0.8)      | 5.5 (1.0) *    | 5.8 (0.7)       | 5.9 (1.0) *    | 5.8 (0.8)                        | 5.8 (0.8)       |
| Total cholesterol, mg/dL           | 205.6 (34.1)      | 207.1 (36.1)   | 204.6 (35.5)        | 209.2 (35.2) | 203.3 (33.8) * | 206.8 (34.8)   | 201.4 (37.4) * | 206.0 (34.9)    | 209.0 (36.1)   | 206.7 (34.8)                     | 204.7 (36.0)    |
| HDL cholesterol, mg/dL             | 63.0 (15.9)       | 62.1 (16.0)    | 64.3 (16.0)         | 62.7 (16.0)  | 60.1 (15.6) *  | 62.7 (15.8)    | 61.8 (17.5)    | 62.5 (15.9)     | 63.1 (16.7)    | 62.9 (16.0)                      | 61.2 (15.6) *   |
| Hypertension, n                    | 505 (39.1%)       | 653 (55.6%) †  | 261 (32.8%)         | 524 (48.1%)  | 373 (64.3%) †  | 1107 (49.2%)   | 51 (23.4%) †   | 977 (44.6%)     | 181 (66.1%) †  | 914 (46.1%)                      | 244 (50.5%)     |
| Diabetes mellitus, n               | 108 (8.4%)        | 146 (12.4%) †  | 47 (5.9%)           | 119 (10.9%)  | 88 (15.2%) †   | 246 (10.9%)    | 8 (3.7%) †     | 209 (9.5%)      | 45 (16.4%) †   | 207 (10.4%)                      | 47 (9.7%)       |
| Hypercholesterolemia, n            | 481 (37.2%)       | 549 (46.8%) †  | 285 (35.8%)         | 485 (44.5%)  | 260 (44.8%) †  | 968 (43.0%)    | 62 (28.4%) †   | 901 (41.1%)     | 129 (47.1%)    | 820 (41.3%)                      | 210 (43.5%)     |
| Low HDL cholesterol, n             | 81 (6.3%)         | 100 (8.5%) †   | 47 (5.9%)           | 80 (7.3%)    | 54 (9.3%)      | 158 (7.0%)     | 23 (10.6%)     | 158 (7.2%)      | 23 (8.4%)      | 142 (7.2%)                       | 39 (8.1%)       |

Data is shown as mean (standard deviation [SD]) or n (%).

HDL, high-density lipoprotein; NGSP, National Glycohemoglobin Standardization Program; NIPPON DATA2010, the National Integrated Project for Prospective Observation of Non-communicable Disease and its Trends in the Aged 2010.

\* P < 0.05 calculated by the *t*-test, Wilcoxon signed-rank test, or an analysis of variance by continuous variables.

† P < 0.05 calculated by the chi-squared test by categorical variables.

**eTable 2.** Frequency and age- and sex-adjusted odds ratios for insufficient knowledge on each cardiovascular risk factor: NIPPON DATA2010

|                         | Hypertension                               |                  |  | Diabetes mellitus                          |                  |  | Hypercholesterolemia                       |                  |  |
|-------------------------|--------------------------------------------|------------------|--|--------------------------------------------|------------------|--|--------------------------------------------|------------------|--|
|                         | Number of insufficient knowledge/total (%) | OR (95% CI)      |  | Number of insufficient knowledge/total (%) | OR (95% CI)      |  | Number of insufficient knowledge/total (%) | OR (95% CI)      |  |
| Annual household income |                                            |                  |  |                                            |                  |  |                                            |                  |  |
| ≥2,000,000 Japanese yen | 225 / 1,818 (12.4)                         | Reference        |  | 1,005 / 1,818 (55.3)                       | Reference        |  | 435 / 1,818 (23.9)                         | Reference        |  |
| <2,000,000 Japanese yen | 73 / 420 (17.4)                            | 1.38 (1.02–1.85) |  | 217 / 420 (51.7)                           | 0.89 (0.72–1.11) |  | 149 / 420 (35.5)                           | 1.55 (1.23–1.96) |  |
| continued               |                                            |                  |  |                                            |                  |  |                                            |                  |  |
|                         | Low HDL cholesterol                        |                  |  | Arrhythmia                                 |                  |  | Smoking                                    |                  |  |
|                         | Number of insufficient knowledge/total (%) | OR (95% CI)      |  | Number of insufficient knowledge/total (%) | OR (95% CI)      |  | Number of insufficient knowledge/total (%) | OR (95% CI)      |  |
|                         | 1,121 / 1,818 (61.7)                       | Reference        |  | 915 / 1,818 (50.3)                         | Reference        |  | 723 / 1,818 (39.8)                         | Reference        |  |
|                         | 260 / 420 (61.9)                           | 1.06 (0.84–1.32) |  | 213 / 420 (50.7)                           | 1.19 (0.95–1.48) |  | 196 / 420 (46.7)                           | 1.23 (0.98–1.53) |  |

CI, confidence interval; OR, odds ratio.

The model included age and sex.

**eTable 3.** Relationship between annual household income and insufficient knowledge on cardiovascular risk factors: NIPPON DATA2010

|                         | Number of insufficient<br>knowledge <sup>a</sup> /total (%) | Model 1   |             | Model 2   |             | Model 3   |             |
|-------------------------|-------------------------------------------------------------|-----------|-------------|-----------|-------------|-----------|-------------|
|                         |                                                             | OR        | 95% CI      | OR        | 95% CI      | OR        | 95% CI      |
| Annual household income |                                                             |           |             |           |             |           |             |
| ≥2,000,000 Japanese yen | 837 / 1,818 (46.0)                                          | Reference |             | Reference |             | Reference |             |
| <2,000,000 Japanese yen | 204 / 420 (48.6)                                            | 1.15      | (0.93–1.43) | 1.16      | (0.93–1.44) | 1.17      | (0.93–1.47) |

CI, confidence interval; OR, odds ratio.

<sup>a</sup> Defined as the number of correct answers on cardiovascular risk factors <4.

Model 1 included age and sex.

Model 2 included model 1 plus regular exercise, smoking, weekly alcohol consumption, and body mass index.

Model 3 included model 2 plus hypertension, diabetes mellitus, hypercholesterolemia, low HDL cholesterol, and the square root of the number of household members.

**eTable 4.** Relationships among socioeconomic status and insufficient knowledge on cardiovascular risk factors by age, sex, and the presence of risk factors:  
NIPPON DATA2010

|                                         | Age                    |             |                        |             |                          | Sex                |             |                  |             |                          | Presence of risk factors |             |                                     |             |                          |
|-----------------------------------------|------------------------|-------------|------------------------|-------------|--------------------------|--------------------|-------------|------------------|-------------|--------------------------|--------------------------|-------------|-------------------------------------|-------------|--------------------------|
|                                         | <65 years<br>(n=1,453) |             | ≥65 years<br>(n=1,014) |             | P for hetero-<br>geneity | Women<br>(n=1,438) |             | Men<br>(n=1,029) |             | P for hetero-<br>geneity | None<br>(n=633)          |             | Having any risk factor<br>(n=1,832) |             | P for hetero-<br>geneity |
|                                         | OR                     | 95% CI      | OR                     | 95% CI      |                          | OR                 | 95% CI      | OR               | 95% CI      |                          | OR                       | 95% CI      | OR                                  | 95% CI      |                          |
| <b>Employment status</b>                |                        |             |                        |             |                          |                    |             |                  |             |                          |                          |             |                                     |             |                          |
| Employed                                | Reference              |             | Reference              |             |                          | Reference          |             | Reference        |             |                          | Reference                |             | Reference                           |             |                          |
| Unemployed                              | 0.93                   | (0.73–1.19) | 0.97                   | (0.73–1.29) | 0.887                    | 1.12               | (0.89–1.41) | 0.90             | (0.66–1.22) | 0.533                    | 0.89                     | (0.63–1.26) | 1.09                                | (0.87–1.35) | 0.241                    |
| <b>Length of education</b>              |                        |             |                        |             |                          |                    |             |                  |             |                          |                          |             |                                     |             |                          |
| ≥13 years                               | Reference              |             | Reference              |             |                          | Reference          |             | Reference        |             |                          | Reference                |             | Reference                           |             |                          |
| 10–12 years                             | 1.15                   | (0.92–1.43) | 1.14                   | (0.79–1.66) |                          | 1.14               | (0.88–1.48) | 1.38             | (1.04–1.84) |                          | 1.43                     | (1.00–2.02) | 1.17                                | (0.93–1.47) |                          |
| <10 years                               | 1.77                   | (1.25–2.51) | 1.61                   | (1.11–2.34) | 0.838                    | 1.96               | (1.41–2.73) | 1.86             | (1.30–2.66) | 0.761                    | 2.37                     | (1.34–4.18) | 1.81                                | (1.38–2.38) | 0.818                    |
| <b>Marital status</b>                   |                        |             |                        |             |                          |                    |             |                  |             |                          |                          |             |                                     |             |                          |
| Ever married                            | Reference              |             | Reference              |             |                          | Reference          |             | Reference        |             |                          | Reference                |             | Reference                           |             |                          |
| Never married                           | 1.04                   | (0.78–1.40) | 0.65                   | (0.16–2.74) | 0.530                    | 1.10               | (0.72–1.69) | 0.79             | (0.51–1.21) | 0.196                    | 0.98                     | (0.60–1.59) | 0.89                                | (0.60–1.32) | 0.517                    |
| <b>Living status</b>                    |                        |             |                        |             |                          |                    |             |                  |             |                          |                          |             |                                     |             |                          |
| Living together                         | Reference              |             | Reference              |             |                          | Reference          |             | Reference        |             |                          | Reference                |             | Reference                           |             |                          |
| Living alone                            | 0.99                   | (0.65–1.49) | 1.13                   | (0.81–1.57) | 0.620                    | 1.15               | (0.83–1.60) | 1.10             | (0.73–1.67) | 0.950                    | 1.21                     | (0.64–2.29) | 1.10                                | (0.83–1.45) | 0.868                    |
| <b>Equivalent household expenditure</b> |                        |             |                        |             |                          |                    |             |                  |             |                          |                          |             |                                     |             |                          |
| Upper 4 quintiles                       | Reference              |             | Reference              |             |                          | Reference          |             | Reference        |             |                          | Reference                |             | Reference                           |             |                          |
| Lowest quintile                         | 1.10                   | (0.84–1.43) | 1.42                   | (1.05–1.92) | 0.216                    | 1.45               | (1.12–1.89) | 0.99             | (0.73–1.35) | 0.070                    | 1.28                     | (0.85–1.94) | 1.22                                | (0.97–1.53) | 0.827                    |

CI, confidence interval; OR, odds ratio.

“Having any risk factor” was defined as having at least one of hypertension, diabetes, hypercholesterolemia, low HDL cholesterol, or smoking.

Models include age (except for age groups) and sex (except for gender groups).

**eTable 5.** Relationship between annual household income and the average number of correct cardiovascular risk factors selected by each participant: NIPPON DATA2010

|                         | Total participants | Mean (95% CI) |             | Model 1             |                  | Model 2             |                  | Model 3             |                  |
|-------------------------|--------------------|---------------|-------------|---------------------|------------------|---------------------|------------------|---------------------|------------------|
|                         |                    |               |             | Difference (95% CI) |                  | Difference (95% CI) |                  | Difference (95% CI) |                  |
| Annual household income |                    |               |             |                     |                  |                     |                  |                     |                  |
| ≥2,000,000 Japanese yen | 1818               | 3.57          | (3.49–3.64) | Reference           |                  | Reference           |                  | Reference           |                  |
| <2,000,000 Japanese yen | 420                | 3.36          | (3.20–3.52) | -0.21               | (-0.39 to -0.03) | -0.21               | (-0.39 to -0.03) | -0.26               | (-0.44 to -0.07) |

CI, confidence interval.

Model 1 included age and sex.

Model 2 included model 1 plus regular exercise, smoking, weekly alcohol consumption, and body mass index.

Model 3 included model 2 plus hypertension, diabetes mellitus, hypercholesterolemia, low HDL cholesterol, and the square root of the number of household members.

**eTable 6.** Average number of correct answers weighted by the accuracy rate of each cardiovascular risk factor and adjusted differences: NIPPON DATA2010

|                                  | All participants | Mean (95% CI)    | Model 1             |                  | Model 2             |                  | Model 3             |                  |  |
|----------------------------------|------------------|------------------|---------------------|------------------|---------------------|------------------|---------------------|------------------|--|
|                                  |                  |                  | Difference (95% CI) |                  | Difference (95% CI) |                  | Difference (95% CI) |                  |  |
| Employment status                |                  |                  |                     |                  |                     |                  |                     |                  |  |
| Employed                         | 1293             | 2.24 (2.19–2.29) | Reference           |                  | Reference           |                  | Reference           |                  |  |
| Unemployed                       | 1174             | 2.22 (2.16–2.27) | –0.01               | (–0.10 to 0.08)  | –0.04               | (–0.13 to 0.05)  | –0.04               | (–0.13 to 0.05)  |  |
| Length of education              |                  |                  |                     |                  |                     |                  |                     |                  |  |
| ≥13 years                        | 797              | 2.35 (2.29–2.42) | Reference           |                  | Reference           |                  | Reference           |                  |  |
| 10–12 years                      | 1090             | 2.25 (2.19–2.30) | –0.12               | (–0.21 to –0.03) | –0.12               | (–0.21 to –0.03) | –0.12               | (–0.21 to –0.03) |  |
| <10 years                        | 580              | 2.02 (1.95–2.10) | –0.36               | (–0.48 to –0.25) | –0.35               | (–0.47 to –0.24) | –0.35               | (–0.46 to –0.23) |  |
| Marital status                   |                  |                  |                     |                  |                     |                  |                     |                  |  |
| Ever married                     | 2249             | 2.24 (2.20–2.28) | Reference           |                  | Reference           |                  | Reference           |                  |  |
| Never married                    | 218              | 2.13 (2.00–2.27) | –0.10               | (–0.24 to 0.04)  | –0.11               | (–0.25 to 0.04)  | –0.11               | (–0.25 to 0.04)  |  |
| Living status                    |                  |                  |                     |                  |                     |                  |                     |                  |  |
| Living together                  | 2193             | 2.24 (2.20–2.28) | Reference           |                  | Reference           |                  | Reference           |                  |  |
| Living alone                     | 274              | 2.14 (2.03–2.26) | –0.09               | (–0.21 to 0.04)  | –0.09               | (–0.21 to 0.03)  | –0.09               | (–0.22 to 0.03)  |  |
| Equivalent household expenditure |                  |                  |                     |                  |                     |                  |                     |                  |  |
| Upper 4 quintiles                | 1984             | 2.26 (2.22–2.30) | Reference           |                  | Reference           |                  | Reference           |                  |  |
| Lowest quintile                  | 483              | 2.11 (2.02–2.19) | –0.15               | (–0.24 to –0.05) | –0.14               | (–0.23 to –0.04) | –0.14               | (–0.24 to –0.05) |  |

CI, confidence interval.

Model 1 included age and sex.

Model 2 included model 1 plus regular exercise, smoking, weekly alcohol consumption, and body mass index.

Model 3 included model 2 plus hypertension, diabetes mellitus, hypercholesterolemia, low HDL cholesterol, and the type of house (own or rent: in the analysis of equivalent household expenditure only).

**eTable 7.** Relationships among socioeconomic status and the number of correct answers by age, sex, and the presence of risk factors: NIPPON DATA2010

|                                         | Age                    |                        |                             | Sex                 |                  |                             | Presence of risk factors |                                     |                             |
|-----------------------------------------|------------------------|------------------------|-----------------------------|---------------------|------------------|-----------------------------|--------------------------|-------------------------------------|-----------------------------|
|                                         | <65 years<br>(n=1,453) | ≥65 years<br>(n=1,014) | P for<br>hetero-<br>geneity | Women<br>(n=1,438)  | Men<br>(n=1,029) | P for<br>hetero-<br>geneity | None<br>(n=633)          | Having any risk factor<br>(n=1,832) | P for<br>hetero-<br>geneity |
|                                         | Difference (95% CI)    |                        |                             | Difference (95% CI) |                  |                             | Difference (95% CI)      |                                     |                             |
| <b>Employment status</b>                |                        |                        |                             |                     |                  |                             |                          |                                     |                             |
| Employed                                | Reference              |                        |                             | Reference           |                  |                             | Reference                |                                     |                             |
| Unemployed                              | 0.12                   | (-0.07 to 0.31)        | 0.222                       | -0.03               | (-0.22 to 0.17)  | 0.992                       | 0.10                     | (-0.19 to 0.39)                     | 0.198                       |
| <b>Length of education</b>              |                        |                        |                             |                     |                  |                             |                          |                                     |                             |
| ≥13 years                               | Reference              |                        |                             | Reference           |                  |                             | Reference                |                                     |                             |
| 10–12 years                             | -0.15                  | (-0.32 to 0.02)        | 0.456                       | -0.13               | (-0.34 to 0.08)  | 0.513                       | -0.29                    | (-0.57 to 0.00)                     | 0.877                       |
| <10 years                               | -0.37                  | (-0.64 to -0.11)       |                             | -0.61               | (-0.88 to -0.34) |                             | -0.83                    | (-1.28 to -0.37)                    |                             |
| <b>Marital status</b>                   |                        |                        |                             |                     |                  |                             |                          |                                     |                             |
| Ever married                            | Reference              |                        |                             | Reference           |                  |                             | Reference                |                                     |                             |
| Never married                           | -0.22                  | (-0.44 to 0.01)        | 0.126                       | -0.27               | (-0.63 to 0.08)  | 0.323                       | -0.21                    | (-0.61 to 0.19)                     | 0.438                       |
| <b>Living status</b>                    |                        |                        |                             |                     |                  |                             |                          |                                     |                             |
| Living together                         | Reference              |                        |                             | Reference           |                  |                             | Reference                |                                     |                             |
| Living alone                            | 0.01                   | (-0.31 to 0.33)        | 0.417                       | -0.16               | (-0.44 to 0.11)  | 0.864                       | -0.16                    | (-0.69 to 0.36)                     | 0.975                       |
| <b>Equivalent household expenditure</b> |                        |                        |                             |                     |                  |                             |                          |                                     |                             |
| Upper 4 quintiles                       | Reference              |                        |                             | Reference           |                  |                             | Reference                |                                     |                             |
| Lowest quintile                         | -0.17                  | (-0.37 to 0.04)        | 0.297                       | -0.36               | (-0.57 to -0.14) | 0.146                       | -0.25                    | (-0.59 to 0.09)                     | 0.967                       |

CI, confidence interval.

“Having any risk factor” was defined as having at least one of hypertension, diabetes, hypercholesterolemia, low HDL cholesterol, or smoking.

Models include age (except for age groups) and sex (except for gender groups).
